# Supplementary material for: Involvement of DPP9 in gene fusions in serous ovarian carcinoma
Source: BMC Cancer. 2017 Sep 11;17:642. doi: 10.1186/s12885-017-3625-6 (PMC5594496; doi:10.1186/s12885-017-3625-6)
Supplement: Supplementary file 1 — RT-PCR primers. Table S2. RNA-seq fusion gene candidates. Table S3. BLAT results of fusion transcripts. Table S4. RNA-seq fusion gene partner candidates among the top 1000 exon-level expression breakpoints. (XLS 86 kb) [file 12885_2017_3625_MOESM1_ESM.xls]

## Sheet: Table_S1
Table S1: RT-PCR primers
DPP9-PPP6R3
Oligo Name	Sequence (5' to 3')	Annealing temperature
DPP9-F1	cgctgcgaatcctgtatgag	55 C
PPPR6R3-R1	gcactgctgggttcaaacaa	55 C
DPP9-F2	aggaagtcgatgagtccga	55 C
PPPR6R3-R2	cctccattttatcctccgtgt	55 C
DPP9-Nest-F1	cctgcgctagaagaaaggaa	55 C
PPPR6-Nest-R1	atcgtctttgggattctggtg	55 C
DPP9-Nest-F2	tgcgctagaagaaaggaagac	55 C
PPPR6-Nest-R2	cgatgtgcttttcctcccata	55 C
DPP9-PLIN3
Oligo Name	Sequence (5' to 3')	Annealing temperature
DPP9-F3	gcgagatcgtacgcctcacca	60 C
PLIN3-R3	caaagggtcccacgagccac	60 C
DPP9-F4	agcaccacctctacgtggtcag	60 C
PLIN3-R4	attccaccatgtggtccagggc	60 C
DPP9-NF3	gtcagccactacagcagcgtg	60 C
PLIN3-NR3	tgctggacaggtcctggaagg	60 C
DPP9-NF4	acttcgacatgttcgtcagccac	60 C
PLIN3-NR4	tcctggaaggagtggatgctgg	60 C

## Sheet: Table_S2
Table S2: RNA-seq fusion gene candidates
Interchromosomal RNA-seq gene fusion candidates in samples with t(11;19)
Sample	Fusion Gene	Strand	Chr1	Position1	Chr2	Position2	GeneSymbol1	GeneSymbol2	Fusion junction sequence*
7	DPP9-PPP6R3	-+	19	4697563	11	68359044	DPP9	PPP6R3	ACAACATGCTTCAAACAAGGCAATATTTCCtatttgccatcccgggtccacccggccctg
8	DPP9-PLIN3	--	19	4688769	19	4839548	DPP9	PLIN3	GCTTCTGGGCTAGCATGATGGAGGCAGCCAcaggtcgagtcccgggcgctcaccatgttc
7	EEF2-ARAP1	++	19	3977239	11	72399509	EEF2	ARAP1	GCACCACTGTGAAGCCCCAGCAGGTGGGTGgccttgaccacaaacatgggggtgccggcc
11	MTCH2-ZNF554	-+	11	47656277	19	2836084	MTCH2	ZNF554	AGGAGAGTGACAAGGGTGAGGAGTTAGGACcttggcctcccaaagtgctggtattacagg
17	NADSYN1-NUDT19	++	11	71189515	19	33204112	NADSYN1	NUDT19	AGGGCGGAGATTTCATCTCGAAACCTGGCGgctggagtacaatggcgcaatctcagctca
17	ZNF44-CCDC84	-+	19	12382926	11	118881474	ZNF44	CCDC84	TCCAAACCTTTCACCATGGATTTCTTGAATctcagcctcctgagtagctaggactacagg
Fusion genes candidates identified by integrating exon-level microarray expression and RNA-seq data:
Sample	Fusion Gene	Strand	Chr1	Position1	Chr2	Position2	GeneSymbol1	GeneSymbol2	Fusion junction sequence*
17	FCF1-LYNX1	+-	14	75202081	8	143846558	FCF1	LYNX1	AGATAAGGCTCACTAGCCACAGAAAAACAGctgcagccgaagccatatggtgtcaccagt
17	LYNX1-FCF1	-+	8	143851173	14	75201955	LYNX1	FCF1	GATAAACTCAAGTCGTAAAACATGATTTTCccagctgcaggctcaggacggcggccagca
12	TMEM123-MMP27	--	11	102319543	11	102565828	TMEM123	MMP27	TTCCACACAACTCCAGTGCTAACTCAACAGgcacctatggaggatctattatgatatcac
8	DDA1-FAM129C	++	19	17426804	19	17638078	DDA1	FAM129C	CGCTACCTGCATCAGCAATGGGACAAAAAGgtgcccctgagccgaggaacgcaggcggtg
13	ZBTB46-WFDC13	-+	20	62421174	20	44333083	ZBTB46	WFDC13	ATATGCAGGGTGGAGGTTCCAAGATATACTttgagtctcggctgctgaacggccaccccg
9	PLXNB1-PRKAR2A	--	3	48455144	3	48802782	PLXNB1	PRKAR2A	AGCCCTGGGGCTTTTCCTGTGGCAGCCCAGgaccgggtgacttttagaagaatcatagtg
9	PLXNB1-PRKAR2A	--	3	48455304	3	48802782	PLXNB1	PRKAR2A	GAGGCACCTGACTCTTTGCCTGAGTTCACGgaccgggtgacttttagaagaatcatagtg
9	PLXNB1-PRKAR2A	--	3	48456208	3	48802782	PLXNB1	PRKAR2A	CACAAGCCTGGGAGTGTGTTCTCCGTGGAGgaccgggtgacttttagaagaatcatagtg
Genomic locations are in Mbp from pter, and according to GRCh37/hg19; Chr, chromosome. *according to the output from FusionMap.
BLAT results
Sample	Fusion Gene	BLAT							Fusion junction sequence*
7	DPP9-PPP6R3								ACAACATGCTTCAAACAAGGCAATATTTCCtatttgccatcccgggtccacccggccctg
8	DPP9-PLIN3								GCTTCTGGGCTAGCATGATGGAGGCAGCCAcaggtcgagtcccgggcgctcaccatgttc

## Sheet: Table_S4
Table S4: BLAT results, fusion junction sequences
DPP9-PPP6R3
Fusion junction sequence*: ACAACATGCTTCAAACAAGGCAATATTTCCtatttgccatcccgggtccacccggccctg
ACTIONS	QUERY	SCORE	START	END	QSIZE	IDENTITY	CHRO	STRAND	START	END	SPAN
browser details	YourSeq	31	30	60	60	1	19	+	4697562	4697592	31
browser details	YourSeq	30	1	30	60	1	11	-	68359044	68359073	30
DPP9-PLIN3
Fusion junction sequence*: GCTTCTGGGCTAGCATGATGGAGGCAGCCAcaggtcgagtcccgggcgctcaccatgttc
ACTIONS	QUERY	SCORE	START	END	QSIZE	IDENTITY	CHRO	STRAND	START	END	SPAN
browser details	YourSeq	30	31	60	60	1	19	-	4839519	4839548	30
browser details	YourSeq	30	1	30	60	1	19	-	4688769	4688798	30
Genomic locations are in Mbp from pter, and according to GRCh37/hg19. *according to the output from FusionMap.
Based on the BLAT tool available at https://genome-euro.ucsc.edu/

## Sheet: Table_S3
Table S3: RNA-seq fusion gene partner candidates among the top 1000 exon-level expression breakpoints
(1) Exon-level gene expression breakpoint candidates gene marked in bold. Rank according to deviation from the median expression of the set.
(2) RNA-seq fusion gene candidate involving the same gene in the same sample.
Exon-level breakpoint (1)	Sample	Fusion gene (2)	Gene1	Gene2	Chr1	Position1	Chr2	Position2	frameshift *	Gene of interest	Cytoband	DAVID gene name	Ensembl Gene ID
27	17	FCF1-LYNX1	FCF1	LYNX1	14	75202081	8	143846558	out-of-frame	LYNX1	8q24.3	Ly6/neurotoxin 1	ENSG00000180155, ENSG00000214749
36	12	VRK1-TDP1	TDP1	VRK1	14	90499450	14	97304154	out-of-frame	VRK1	14q32	vaccinia related kinase 1	ENSG00000100749
37	8	DDA1-FAM129C	DDA1	FAM129C	19	17426804	19	17638078	in-frame	FAM129C	19p13.11	family with sequence similarity 129, member C	ENSG00000167483
69	15	B4GALT5-SLC34A2	B4GALT5	SLC34A2	20	48251924	4	25679072	out-of-frame	SLC34A2	4p15.2	solute carrier family 34 (sodium phosphate), member 2	ENSG00000157765
70	15	TDRD9-ASPG	TDRD9	ASPG	14	104508524	14	104558970	out-of-frame	TDRD9	14q32.33	tudor domain containing 9	ENSG00000156414
80	12	TMEM123-MMP27	TMEM123	MMP27	11	102319543	11	102565828	in-frame	MMP27	11q24	matrix metallopeptidase 27	ENSG00000137675
85	12	VRK1-TDP1	TDP1	VRK1	14	90499450	14	97304154	out-of-frame	TDP1	14q32.11	tyrosyl-DNA phosphodiesterase 1	ENSG00000042088
90	15	PDE4D-CCNB1	PDE4D	CCNB1	5	59783769	5	68463735	in-frame	PDE4D	5q12	phosphodiesterase 4D, cAMP-specific (phosphodiesterase E3 dunce homolog, Drosophila)	ENSG00000113448
94	7	COL9A1-DGCR5	DGCR5	COL9A1	22	18977113	6	70948957	out-of-frame	COL9A1	6q13	collagen, type IX, alpha 1	ENSG00000112280
158	4	RBM43-NRG4	NRG4	RBM43	15	76248352	2	152105933	out-of-frame	NRG4	15q24.2	neuregulin 4	ENSG00000169752
162	13	ZBTB46-WFDC13	WFDC13	ZBTB46	20	44333083	20	62421174	in-frame	WFDC13	20q13.12	WAP four-disulfide core domain 13	ENSG00000168634
163	2	TAP2-HLA-DOB	HLA-DOB	TAP2	6	32784729	6	32797177	in-frame	TAP2	6p21.3	transporter 2, ATP-binding cassette, sub-family B (MDR/TAP)	ENSG00000206235, ENSG00000206299, ENSG00000204267
215	15	COL9A1-DGCR5	DGCR5	COL9A1	22	18977113	6	70948957	out-of-frame	COL9A1	6q13	collagen, type IX, alpha 1	ENSG00000112280
265	12	TAP2-HLA-DOB	HLA-DOB	TAP2	6	32784729	6	32797177	in-frame	TAP2	6p21.3	transporter 2, ATP-binding cassette, sub-family B (MDR/TAP)	ENSG00000206235, ENSG00000206299, ENSG00000204267
276	15	GALNT8-KCNA6	GALNT8	KCNA6	12	4874712	12	4959904	out-of-frame	GALNT8	12p13.3	UDP-N-acetyl-alpha-D-galactosamine:polypeptide N-acetylgalactosaminyltransferase 8 (GalNAc-T8)	ENSG00000130035
284	13	PPP2R2B-SKP1	SKP1	PPP2R2B	5	133509713	5	146257565	out-of-frame	PPP2R2B	5q32	protein phosphatase 2 (formerly 2A), regulatory subunit B, beta isoform	ENSG00000156475
290	12	KIAA1409-COX8C	KIAA1409	COX8C	14	93799869	14	93814374	out-of-frame	COX8C	14q32.12	cytochrome c oxidase subunit 8C	ENSG00000187581
291	10	MGEA5-KCNIP2	MGEA5	KCNIP2	10	103559209	10	103588952	in-frame	KCNIP2	10q24	Kv channel interacting protein 2	ENSG00000120049
336	8	TM2D1-TRMT5	TM2D1	TRMT5	1	62160369	14	61440368	out-of-frame	TM2D1	1p31.3	TM2 domain containing 1	ENSG00000162604
371	13	CDHR3-MVP	MVP	CDHR3	16	29847025	7	105673953	out-of-frame	CDHR3	7q22.3	hypothetical protein FLJ23834	ENSG00000128536
397	12	TC2N-CATSPERB	CATSPERB	TC2N	14	92195823	14	92246920	out-of-frame	CATSPERB	14q32.12	cation channel, sperm-associated, beta	ENSG00000133962
474	15	TAP2-HLA-DOB	HLA-DOB	TAP2	6	32784729	6	32797177	in-frame	TAP2	6p21.3	transporter 2, ATP-binding cassette, sub-family B (MDR/TAP)	ENSG00000206235, ENSG00000206299, ENSG00000204267
480	6	POU5F1-LAMA3	LAMA3	POU5F1	18	21494374	6	31134203	out-of-frame	LAMA3	18q11.2	laminin, alpha 3	ENSG00000053747
485	8	CLU-BCAM	BCAM	CLU	19	45324264	8	27462578	out-of-frame	CLU	8p21-p12	clusterin	ENSG00000120885
494	12	UCHL3-LMO7	UCHL3	LMO7	13	76169126	13	76195899	in-frame	LMO7	13q22.2	LIM domain 7	ENSG00000136153
514	17	PKHD1L1-EBAG9	PKHD1L1	EBAG9	8	110539249	8	110563039	out-of-frame	PKHD1L1	8q23	polycystic kidney and hepatic disease 1 (autosomal recessive)-like 1	ENSG00000205038
573	2	GNE-COG7	COG7	GNE	16	23404668	9	36216531	out-of-frame	GNE	9p13.3	glucosamine (UDP-N-acetyl)-2-epimerase/N-acetylmannosamine kinase	ENSG00000159921
609	11	FGFR2-FAM24B	FGFR2	FAM24B	10	123274637	10	124615302	out-of-frame	FGFR2	10q26	fibroblast growth factor receptor 2	ENSG00000066468
690	2	CHRM3-SCRN3	CHRM3	SCRN3	1	239792568	2	175287613	out-of-frame	SCRN3	2q31.1	secernin 3	ENSG00000144306
691	2	CHRM3-WDR72	CHRM3	WDR72	1	239792568	15	53815519	in-frame	WDR72	15q21.3	WD repeat domain 72	ENSG00000166415
796	9	PLXNB1-PRKAR2A	PLXNB1	PRKAR2A	3	48455304	3	48802782	in-frame	PRKAR2A	3p21.3-p21.2	protein kinase, cAMP-dependent, regulatory, type II, alpha	ENSG00000114302
833	8	FBRS-TIAL1	TIAL1	FBRS	10	121356359	16	30681313	out-of-frame	TIAL1	10q	TIA1 cytotoxic granule-associated RNA binding protein-like 1	ENSG00000151923
888	13	MAML3-INPP4B	MAML3	INPP4B	4	141074014	4	143067149	in-frame	INPP4B	4q31.21	inositol polyphosphate-4-phosphatase, type II, 105kDa	ENSG00000109452
975	12	CDC42BPB-SPEG	CDC42BPB	SPEG	14	103399143	2	220326638	in-frame	CDC42BPB	14q32.3	CDC42 binding protein kinase beta (DMPK-like)	ENSG00000198752
986	15	DSTYK-SLC22A4	DSTYK	SLC22A4	1	205112296	5	131670478	out-of-frame	SLC22A4	5q31.1	solute carrier family 22 (organic cation/ergothioneine transporter), member 4	ENSG00000197208
Genomic locations are in Mbp from pter, and according to GRCh37/hg19; Chr, chromosome.
* According to FusionMap program.
